# Supplementary material for: Occurrence of the Microcystins MC-LW and MC-LF in Dutch Surface Waters and Their Contribution to Total Microcystin Toxicity
Source: MDPI journal article supplement (doi:10.3390/md11072643), 2013-07-22
Supplement: s2 [file s2]

marinedrugs-11-02643-s001.mol
  corina  04141406373D 1   1.00000     0.00000 
CORINA 3.49 0023  12.04.2013
 75 76  0  0  0  0  0  0  0  0999 V2000
    0.7773    2.1675    1.2083 C   0  0  0  0  0  0  0  0  0  0  0  0
    0.7587    0.7060    0.8413 C   0  0  0  0  0  0  0  0  0  0  0  0
    0.4796   -0.1303    2.0917 C   0  0  0  0  0  0  0  0  0  0  0  0
    1.9613    2.7686    1.5928 C   0  0  0  0  0  0  0  0  0  0  0  0
    1.9783    4.1092    1.9294 C   0  0  0  0  0  0  0  0  0  0  0  0
    0.8115    4.8488    1.8812 C   0  0  0  0  0  0  0  0  0  0  0  0
   -0.3723    4.2479    1.4959 C   0  0  0  0  0  0  0  0  0  0  0  0
   -0.3885    2.9084    1.1550 C   0  0  0  0  0  0  0  0  0  0  0  0
    0.3370   -1.6023    1.6995 C   0  0  0  0  0  0  0  0  0  0  0  0
    0.0620   -2.4260    2.9311 C   0  0  0  0  0  0  0  0  0  0  0  0
    0.8356   -3.4668    3.2206 C   0  0  0  0  0  0  0  0  0  0  0  0
    0.6496   -4.1918    4.4872 C   0  0  0  0  0  0  0  0  0  0  0  0
   -0.8223   -1.7572    0.7130 C   0  0  0  0  0  0  0  0  0  0  0  0
    1.9035   -3.9046    2.2516 C   0  0  0  0  0  0  0  0  0  0  0  0
    1.4232   -5.2325    4.7767 C   0  0  0  0  0  0  0  0  0  0  0  0
    1.2330   -5.9740    6.0719 C   0  0  0  0  0  0  0  0  0  0  0  0
    2.4135   -5.8343    6.9391 N   0  0  0  0  0  0  0  0  0  0  0  0
    0.9178   -7.4446    5.8048 C   0  0  0  0  0  0  0  0  0  0  0  0
    2.0726   -8.1673    5.1838 C   0  0  0  0  0  0  0  0  0  0  0  0
    2.0899   -9.5236    5.0450 N   0  0  0  0  0  0  0  0  0  0  0  0
    3.0567   -7.5562    4.7955 O   0  0  0  0  0  0  0  0  0  0  0  0
   -0.2912   -7.4977    4.8580 C   0  0  0  0  0  0  0  0  0  0  0  0
    1.2054  -10.3523    5.8808 C   0  0  0  0  0  0  0  0  0  0  0  0
    1.9902  -11.5672    6.3805 C   0  0  0  0  0  0  0  0  0  0  0  0
    2.3854  -12.5002    5.2423 C   0  0  0  0  0  0  0  0  0  0  0  0
    3.7978  -12.1871    4.7956 C   0  0  0  0  0  0  0  0  0  0  0  0
    6.0919  -11.9658    5.4224 C   0  0  0  0  0  0  0  0  0  0  0  0
    7.2304  -12.4699    6.2315 C   0  0  0  0  0  0  0  0  0  0  0  0
    8.2620  -11.6244    6.4825 N   0  0  0  0  0  0  0  0  0  0  0  0
    9.3083  -12.0101    7.4513 C   0  0  0  0  0  0  0  0  0  0  0  0
    3.9487  -11.6575    3.7176 O   0  0  0  0  0  0  0  0  0  0  0  0
    6.2870  -10.9368    4.5969 C   0  0  0  0  0  0  0  0  0  0  0  0
    7.2278  -13.6272    6.6034 O   0  0  0  0  0  0  0  0  0  0  0  0
   10.1052  -10.7515    7.7419 C   0  0  0  0  0  0  0  0  0  0  0  0
    9.4109   -9.5886    7.8454 N   0  0  0  0  0  0  0  0  0  0  0  0
   11.3032  -10.8047    7.8746 O   0  0  0  0  0  0  0  0  0  0  0  0
    8.6900  -12.5035    8.7599 C   0  0  0  0  0  0  0  0  0  0  0  0
    2.4988   -4.6805    7.6603 C   0  0  0  0  0  0  0  0  0  0  0  0
    3.5842   -4.5195    8.6927 C   0  0  0  0  0  0  0  0  0  0  0  0
    4.8931   -4.3763    8.0221 N   0  0  0  0  0  0  0  0  0  0  0  0
    5.9375   -5.0245    8.6206 C   0  0  0  0  0  0  0  0  0  0  0  0
    7.3310   -4.8374    8.0723 C   0  0  0  0  0  0  0  0  0  0  0  0
    8.3570   -5.1373    9.1654 C   0  0  0  0  0  0  0  0  0  0  0  0
    9.4219   -6.0009    8.5996 N   0  0  0  0  0  0  0  0  0  0  0  0
    9.1933   -7.3405    8.6827 C   0  0  0  0  0  0  0  0  0  0  0  0
   10.1470   -8.3268    8.0548 C   0  0  0  0  0  0  0  0  0  0  0  0
    8.2133   -7.7535    9.2748 O   0  0  0  0  0  0  0  0  0  0  0  0
    5.7447   -5.7447    9.5760 O   0  0  0  0  0  0  0  0  0  0  0  0
    1.7060   -3.7796    7.4750 O   0  0  0  0  0  0  0  0  0  0  0  0
    7.5030   -3.3623    7.5895 R1  0  0  0  0  0  0  0  0  0  0  0  0
   10.6237   -7.7935    6.7018 C   0  0  0  0  0  0  0  0  0  0  0  0
   11.6836   -8.7354    6.1272 C   0  0  0  0  0  0  0  0  0  0  0  0
   13.7531   -8.8281    3.0078 C   0  0  0  0  0  0  0  0  0  0  0  0
   14.6560   -9.6305    2.5182 N   0  0  0  0  0  0  0  0  0  0  0  0
   13.3786   -7.7057    2.3076 N   0  0  0  0  0  0  0  0  0  0  0  0
    4.0441   -1.9184   11.4963 C   0  0  0  0  0  0  0  0  0  0  0  0
    5.0279   -1.8211   12.5774 N   0  0  0  0  0  0  0  0  0  0  0  0
    4.9728   -0.7724   13.4648 C   0  0  0  0  0  0  0  0  0  0  0  0
    5.8961   -0.6811   14.4794 N   0  0  0  0  0  0  0  0  0  0  0  0
    4.0451    0.1353   13.3442 N   0  0  0  0  0  0  0  0  0  0  0  0
   12.1602   -8.2022    4.7746 C   0  0  0  0  0  0  0  0  0  0  0  0
   13.1751   -9.1041    4.2243 N   0  0  0  0  0  0  0  0  0  0  0  0
    3.3002   -3.2690    9.5304 C   0  0  0  0  0  0  0  0  0  0  0  0
    4.3277   -3.1674   10.6595 C   0  0  0  0  0  0  0  0  0  0  0  0
    4.8224  -12.5614    5.6061 N   0  0  0  0  0  0  0  0  0  0  0  0
    4.5972  -13.5669    6.7077 R   0  0  0  0  0  0  0  0  0  0  0  0
    4.3643  -14.6069    7.8469 R   0  0  0  0  0  0  0  0  0  0  0  0
    8.9661   -3.8454    9.6495 C   0  0  0  0  0  0  0  0  0  0  0  0
   10.0515   -3.5006    9.2460 O   0  0  0  0  0  0  0  0  0  0  0  0
    8.3023   -3.0785   10.5288 O   0  0  0  0  0  0  0  0  0  0  0  0
   -0.0125  -10.7983    5.1178 C   0  0  0  0  0  0  0  0  0  0  0  0
   -0.0046  -10.7908    3.9095 O   0  0  0  0  0  0  0  0  0  0  0  0
   -1.1075  -11.2043    5.7793 O   0  0  0  0  0  0  0  0  0  0  0  0
    1.5623    0.0144    3.0131 O   0  0  0  0  0  0  0  0  0  0  0  0
    1.1797   -0.1126    4.3840 C   0  0  0  0  0  0  0  0  0  0  0  0
  1  2  1  0      
  2  3  1  0      
  1  4  2  0      
  4  5  1  0      
  5  6  2  0      
  6  7  1  0      
  7  8  2  0      
  8  1  1  0      
  3  9  1  0      
  9 10  1  0      
 10 11  2  0      
 11 12  1  0      
  9 13  1  0      
 11 14  1  0      
 12 15  2  0      
 16 15  1  0      
 16 17  1  0      
 16 18  1  0      
 18 19  1  0      
 19 20  1  0      
 19 21  2  0      
 18 22  1  0      
 20 23  1  0      
 23 24  1  0      
 24 25  1  0      
 25 26  1  0      
 27 28  1  0      
 28 29  1  0      
 29 30  1  0      
 26 31  2  0      
 27 32  2  0      
 28 33  2  0      
 30 34  1  0      
 34 35  1  0      
 34 36  2  0      
 30 37  1  0      
 17 38  1  0      
 38 39  1  0      
 39 40  1  0      
 40 41  1  0      
 41 42  1  0      
 42 43  1  0      
 43 44  1  0      
 44 45  1  0      
 45 46  1  0      
 45 47  2  0      
 41 48  2  0      
 38 49  2  0      
 42 50  1  0      
 46 35  1  0      
 51 52  1  0      
 53 54  2  0      
 53 55  1  0      
 56 57  1  0      
 57 58  1  0      
 58 59  1  0      
 58 60  2  0      
 46 51  1  0      
 52 61  1  0      
 61 62  1  0      
 62 53  1  0      
 39 63  1  0      
 63 64  1  0      
 64 56  1  0      
 65 66  1  0      
 66 67  1  0      
 26 65  1  0      
 27 65  1  0      
 68 69  2  0      
 68 70  1  0      
 43 68  1  0      
 23 71  1  0      
 71 72  2  0      
 71 73  1  0      
 74 75  1  0      
  3 74  1  0      
M  STY  1   1 SUP
M  SLB  1   1   1
M  SAL   1  3  65  66  67
M  SBL   1  2  67  68
M  SMT   1 NR2
M  SBV   1 67   -9.7598    7.2295
M  SBV   1 68  -11.1886    7.2295
M  STY  1   2 SUP
M  SLB  1   2   2
M  SAL   2  3  68  69  70
M  SBL   2  1  71
M  SMT   2 COOH
M  SBV   2 71  -10.1182    6.1988
M  STY  1   3 SUP
M  SLB  1   3   3
M  SAL   3  3  71  72  73
M  SBL   3  1  72
M  SMT   3 COOH
M  SBV   3 72  -10.1187    7.4357
M  STY  1   4 SUP
M  SLB  1   4   4
M  SAL   4  2  74  75
M  SBL   4  1  76
M  SMT   4 OCH3
M  SBV   4 76   -9.5006    7.7926
M  END
$$$$
