# Supplementary material for: Occurrence of the Microcystins MC-LW and MC-LF in Dutch Surface Waters and Their Contribution to Total Microcystin Toxicity
Source: MDPI journal article supplement (doi:10.3390/md11072643), 2013-07-22
Supplement: s3 [file s3]

marinedrugs-11-02643-s001.mol
  ChemDraw04141418272D

 75 76  0  0  0  0  0  0  0  0999 V2000
   -8.2250    1.2430    0.0000 C   0  0  0  0  0  0  0  0  0  0  0  0
   -7.5106    0.8306    0.0000 C   0  0  0  0  0  0  0  0  0  0  0  0
   -6.7961    1.2430    0.0000 C   0  0  0  0  0  0  0  0  0  0  0  0
   -8.2250    2.0680    0.0000 C   0  0  0  0  0  0  0  0  0  0  0  0
   -8.9395    2.4805    0.0000 C   0  0  0  0  0  0  0  0  0  0  0  0
   -9.6539    2.0680    0.0000 C   0  0  0  0  0  0  0  0  0  0  0  0
   -9.6539    1.2430    0.0000 C   0  0  0  0  0  0  0  0  0  0  0  0
   -8.9395    0.8306    0.0000 C   0  0  0  0  0  0  0  0  0  0  0  0
   -6.0817    0.8306    0.0000 C   0  0  0  0  0  0  0  0  0  0  0  0
   -5.3672    1.2430    0.0000 C   0  0  0  0  0  0  0  0  0  0  0  0
   -4.6528    0.8306    0.0000 C   0  0  0  0  0  0  0  0  0  0  0  0
   -3.9384    1.2430    0.0000 C   0  0  0  0  0  0  0  0  0  0  0  0
   -6.4942    0.1161    0.0000 C   0  0  0  0  0  0  0  0  0  0  0  0
   -4.6528    0.0056    0.0000 C   0  0  0  0  0  0  0  0  0  0  0  0
   -3.2239    0.8306    0.0000 C   0  0  0  0  0  0  0  0  0  0  0  0
   -2.4296    1.2018    0.0000 C   0  0  0  0  0  0  0  0  0  0  0  0
   -1.7151    0.7894    0.0000 N   0  0  0  0  0  0  0  0  0  0  0  0
   -2.4296    2.0268    0.0000 C   0  0  0  0  0  0  0  0  0  0  0  0
   -1.7151    2.4393    0.0000 C   0  0  0  0  0  0  0  0  0  0  0  0
   -1.7151    3.2643    0.0000 N   0  0  0  0  0  0  0  0  0  0  0  0
   -1.0007    2.0268    0.0000 O   0  0  0  0  0  0  0  0  0  0  0  0
   -3.2264    2.2403    0.0000 C   0  0  0  0  0  0  0  0  0  0  0  0
   -1.1318    3.8476    0.0000 C   0  0  0  0  0  0  0  0  0  0  0  0
   -0.4173    3.4351    0.0000 C   0  0  0  0  0  0  0  0  0  0  0  0
    0.2971    3.8476    0.0000 C   0  0  0  0  0  0  0  0  0  0  0  0
    1.0116    3.4351    0.0000 C   0  0  0  0  0  0  0  0  0  0  0  0
    2.4404    3.4351    0.0000 C   0  0  0  0  0  0  0  0  0  0  0  0
    3.1549    3.8476    0.0000 C   0  0  0  0  0  0  0  0  0  0  0  0
    3.8694    3.4351    0.0000 N   0  0  0  0  0  0  0  0  0  0  0  0
    3.8694    2.6101    0.0000 C   0  0  0  0  0  0  0  0  0  0  0  0
    1.0116    2.6101    0.0000 O   0  0  0  0  0  0  0  0  0  0  0  0
    2.4404    2.6101    0.0000 C   0  0  0  0  0  0  0  0  0  0  0  0
    3.1549    4.6725    0.0000 O   0  0  0  0  0  0  0  0  0  0  0  0
    5.1444    2.4441    0.0000 C   0  0  0  0  0  0  0  0  0  0  0  0
    4.8763    1.4128    0.0000 N   0  0  0  0  0  0  0  0  0  0  0  0
    5.7278    3.0274    0.0000 O   0  0  0  0  0  0  0  0  0  0  0  0
    3.2860    2.0268    0.0000 C   0  0  0  0  0  0  0  0  0  0  0  0
   -1.7151   -0.0356    0.0000 C   0  0  0  0  0  0  0  0  0  0  0  0
   -1.0007   -0.4481    0.0000 C   0  0  0  0  0  0  0  0  0  0  0  0
   -0.2862   -0.0356    0.0000 N   0  0  0  0  0  0  0  0  0  0  0  0
    0.4282   -0.4481    0.0000 C   0  0  0  0  0  0  0  0  0  0  0  0
    1.1427   -0.0356    0.0000 C   0  0  0  0  0  0  0  0  0  0  0  0
    1.8571   -0.4481    0.0000 C   0  0  0  0  0  0  0  0  0  0  0  0
    2.5715   -0.0356    0.0000 N   0  0  0  0  0  0  0  0  0  0  0  0
    4.0719   -0.2991    0.0000 C   0  0  0  0  0  0  0  0  0  0  0  0
    5.2476    0.4228    0.0000 C   0  0  0  0  0  0  0  0  0  0  0  0
    4.0719   -1.1241    0.0000 O   0  0  0  0  0  0  0  0  0  0  0  0
    0.4282   -1.2731    0.0000 O   0  0  0  0  0  0  0  0  0  0  0  0
   -2.4296   -0.4481    0.0000 O   0  0  0  0  0  0  0  0  0  0  0  0
    1.1427    0.7894    0.0000 R1  0  0  0  0  0  0  0  0  0  0  0  0
    6.1138    0.7734    0.0000 C   0  0  0  0  0  0  0  0  0  0  0  0
    6.6913    0.3816    0.0000 C   0  0  0  0  0  0  0  0  0  0  0  0
    8.9394    0.7734    0.0000 C   0  0  0  0  0  0  0  0  0  0  0  0
    9.6539    0.3609    0.0000 N   0  0  0  0  0  0  0  0  0  0  0  0
    8.9394    1.5984    0.0000 N   0  0  0  0  0  0  0  0  0  0  0  0
   -1.5999   -2.3409    0.0000 C   0  0  0  0  0  0  0  0  0  0  0  0
   -1.1668   -3.0834    0.0000 N   0  0  0  0  0  0  0  0  0  0  0  0
   -1.7237   -3.8672    0.0000 C   0  0  0  0  0  0  0  0  0  0  0  0
   -2.5487   -3.8727    0.0000 N   0  0  0  0  0  0  0  0  0  0  0  0
   -1.3036   -4.6725    0.0000 N   0  0  0  0  0  0  0  0  0  0  0  0
    7.5988    0.8766    0.0000 C   0  0  0  0  0  0  0  0  0  0  0  0
    8.3413    0.3609    0.0000 N   0  0  0  0  0  0  0  0  0  0  0  0
   -1.4132   -1.1626    0.0000 C   0  0  0  0  0  0  0  0  0  0  0  0
   -0.8298   -1.7459    0.0000 C   0  0  0  0  0  0  0  0  0  0  0  0
    1.3699    3.6418    0.0000 N   0  0  0  0  0  0  0  0  0  0  0  0
    1.9583    3.3020    0.0000 R   0  0  0  0  0  0  0  0  0  0  0  0
    2.5469    3.6418    0.0000 R   0  0  0  0  0  0  0  0  0  0  0  0
    1.8570   -1.2721    0.0000 C   0  0  0  0  0  0  0  0  0  0  0  0
    2.4455   -1.6118    0.0000 O   0  0  0  0  0  0  0  0  0  0  0  0
    1.2685   -1.6118    0.0000 O   0  0  0  0  0  0  0  0  0  0  0  0
   -1.1324    4.2604    0.0000 C   0  0  0  0  0  0  0  0  0  0  0  0
   -0.4180    3.8479    0.0000 O   0  0  0  0  0  0  0  0  0  0  0  0
   -1.8469    3.8479    0.0000 O   0  0  0  0  0  0  0  0  0  0  0  0
   -6.1786    2.0128    0.0000 O   0  0  0  0  0  0  0  0  0  0  0  0
   -5.5901    1.6730    0.0000 C   0  0  0  0  0  0  0  0  0  0  0  0
  1  2  1  0      
  2  3  1  0      
  1  4  2  0      
  4  5  1  0      
  5  6  2  0      
  6  7  1  0      
  7  8  2  0      
  8  1  1  0      
  3  9  1  0      
  9 10  1  0      
 10 11  2  0      
 11 12  1  0      
  9 13  1  1      
 11 14  1  0      
 12 15  2  0      
 16 15  1  1      
 16 17  1  0      
 16 18  1  0      
 18 19  1  0      
 19 20  1  0      
 19 21  2  0      
 18 22  1  1      
 20 23  1  0      
 23 24  1  0      
 24 25  1  0      
 25 26  1  0      
 27 28  1  0      
 28 29  1  0      
 29 30  1  0      
 26 31  2  0      
 27 32  2  0      
 28 33  2  0      
 30 34  1  0      
 34 35  1  0      
 34 36  2  0      
 30 37  1  1      
 17 38  1  0      
 38 39  1  0      
 39 40  1  0      
 40 41  1  0      
 41 42  1  0      
 42 43  1  0      
 43 44  1  0      
 44 45  1  0      
 45 46  1  0      
 45 47  2  0      
 41 48  2  0      
 38 49  2  0      
 42 50  1  1      
 46 35  1  0      
 51 52  1  0      
 53 54  2  0      
 53 55  1  0      
 56 57  1  0      
 57 58  1  0      
 58 59  1  0      
 58 60  2  0      
 46 51  1  1      
 52 61  1  0      
 61 62  1  0      
 62 53  1  0      
 39 63  1  1      
 63 64  1  0      
 64 56  1  0      
 65 66  1  0      
 66 67  1  0      
 26 65  1  0      
 27 65  1  0      
 68 69  2  0      
 68 70  1  0      
 43 68  1  0      
 23 71  1  1      
 71 72  2  0      
 71 73  1  0      
 74 75  1  0      
  3 74  1  0      
M  STY  1   1 SUP
M  SLB  1   1   1
M  SAL   1  3  65  66  67
M  SBL   1  2  67  68
M  SMT   1 NR2
M  SBV   1 67   -9.7598    7.2295
M  SBV   1 68  -11.1886    7.2295
M  STY  1   2 SUP
M  SLB  1   2   2
M  SAL   2  3  68  69  70
M  SBL   2  1  71
M  SMT   2 COOH
M  SBV   2 71  -10.1182    6.1988
M  STY  1   3 SUP
M  SLB  1   3   3
M  SAL   3  3  71  72  73
M  SBL   3  1  72
M  SMT   3 COOH
M  SBV   3 72  -10.1187    7.4357
M  STY  1   4 SUP
M  SLB  1   4   4
M  SAL   4  2  74  75
M  SBL   4  1  76
M  SMT   4 OCH3
M  SBV   4 76   -9.5006    7.7926
M  END
