# Supplementary material for: Occurrence of the Microcystins MC-LW and MC-LF in Dutch Surface Waters and Their Contribution to Total Microcystin Toxicity
Source: MDPI journal article supplement (doi:10.3390/md11072643), 2013-07-22
Supplement: s4 [file s4]

marinedrugs-11-02643-s002.mol
  corina  04141406383D 1   1.00000     0.00000 
CORINA 3.49 0023  12.04.2013
 72 73  0  0  0  0  0  0  0  0999 V2000
   -0.7655    2.6861    1.9492 C   0  0  0  0  0  0  0  0  0  0  0  0
   -0.8832    1.2138    1.6504 C   0  0  0  0  0  0  0  0  0  0  0  0
   -0.8607    0.4240    2.9606 C   0  0  0  0  0  0  0  0  0  0  0  0
    0.4808    3.2802    2.0168 C   0  0  0  0  0  0  0  0  0  0  0  0
    0.5887    4.6308    2.2910 C   0  0  0  0  0  0  0  0  0  0  0  0
   -0.5497    5.3874    2.4971 C   0  0  0  0  0  0  0  0  0  0  0  0
   -1.7961    4.7935    2.4286 C   0  0  0  0  0  0  0  0  0  0  0  0
   -1.9042    3.4438    2.1501 C   0  0  0  0  0  0  0  0  0  0  0  0
   -1.1049   -1.0576    2.6673 C   0  0  0  0  0  0  0  0  0  0  0  0
   -1.0827   -1.8355    3.9578 C   0  0  0  0  0  0  0  0  0  0  0  0
   -0.2780   -2.8849    4.0873 C   0  0  0  0  0  0  0  0  0  0  0  0
   -0.1637   -3.5685    5.3849 C   0  0  0  0  0  0  0  0  0  0  0  0
   -2.4681   -1.2262    1.9935 C   0  0  0  0  0  0  0  0  0  0  0  0
    0.5175   -3.3748    2.9048 C   0  0  0  0  0  0  0  0  0  0  0  0
    0.6410   -4.6179    5.5144 C   0  0  0  0  0  0  0  0  0  0  0  0
    0.7579   -5.3169    6.8413 C   0  0  0  0  0  0  0  0  0  0  0  0
    2.1142   -5.1800    7.3944 N   0  0  0  0  0  0  0  0  0  0  0  0
    0.3658   -6.7883    6.7071 C   0  0  0  0  0  0  0  0  0  0  0  0
    1.3262   -7.5532    5.8507 C   0  0  0  0  0  0  0  0  0  0  0  0
    1.2871   -8.9135    5.7590 N   0  0  0  0  0  0  0  0  0  0  0  0
    2.1973   -6.9770    5.2168 O   0  0  0  0  0  0  0  0  0  0  0  0
   -1.0363   -6.8408    6.0811 C   0  0  0  0  0  0  0  0  0  0  0  0
    0.6154   -9.6935    6.8120 C   0  0  0  0  0  0  0  0  0  0  0  0
    1.4779  -10.9120    7.1493 C   0  0  0  0  0  0  0  0  0  0  0  0
    1.5702  -11.8852    5.9799 C   0  0  0  0  0  0  0  0  0  0  0  0
    2.8383  -11.6179    5.1976 C   0  0  0  0  0  0  0  0  0  0  0  0
    5.2195  -11.4365    5.2451 C   0  0  0  0  0  0  0  0  0  0  0  0
    6.5124  -11.9437    5.7707 C   0  0  0  0  0  0  0  0  0  0  0  0
    7.5867  -11.1152    5.7358 N   0  0  0  0  0  0  0  0  0  0  0  0
    8.8299  -11.4966    6.4367 C   0  0  0  0  0  0  0  0  0  0  0  0
    2.7335  -11.1200    4.0992 O   0  0  0  0  0  0  0  0  0  0  0  0
    5.2256  -10.4362    4.3627 C   0  0  0  0  0  0  0  0  0  0  0  0
    6.5831  -13.0897    6.1670 O   0  0  0  0  0  0  0  0  0  0  0  0
    9.6945  -10.2499    6.4861 C   0  0  0  0  0  0  0  0  0  0  0  0
    9.0671   -9.0678    6.7139 N   0  0  0  0  0  0  0  0  0  0  0  0
   10.8887  -10.3307    6.3310 O   0  0  0  0  0  0  0  0  0  0  0  0
    8.5379  -11.9407    7.8705 C   0  0  0  0  0  0  0  0  0  0  0  0
    2.3897   -4.0081    8.0345 C   0  0  0  0  0  0  0  0  0  0  0  0
    3.6951   -3.8450    8.7697 C   0  0  0  0  0  0  0  0  0  0  0  0
    4.8056   -3.7512    7.7987 N   0  0  0  0  0  0  0  0  0  0  0  0
    5.9547   -4.4040    8.1490 C   0  0  0  0  0  0  0  0  0  0  0  0
    7.1760   -4.2647    7.2743 C   0  0  0  0  0  0  0  0  0  0  0  0
    8.4323   -4.5556    8.0968 C   0  0  0  0  0  0  0  0  0  0  0  0
    9.3166   -5.4603    7.3222 N   0  0  0  0  0  0  0  0  0  0  0  0
    9.0935   -6.7915    7.5003 C   0  0  0  0  0  0  0  0  0  0  0  0
    9.8522   -7.8177    6.6956 C   0  0  0  0  0  0  0  0  0  0  0  0
    8.2766   -7.1650    8.3224 O   0  0  0  0  0  0  0  0  0  0  0  0
    5.9886   -5.0911    9.1483 O   0  0  0  0  0  0  0  0  0  0  0  0
    1.5896   -3.0948    8.0181 O   0  0  0  0  0  0  0  0  0  0  0  0
    7.2483   -2.8097    6.7153 R1  0  0  0  0  0  0  0  0  0  0  0  0
    8.8244   -7.1232    3.0540 C   0  0  0  0  0  0  0  0  0  0  0  0
    4.9143   -2.4593   10.4552 C   0  0  0  0  0  0  0  0  0  0  0  0
    4.8621   -1.1819   11.2956 C   0  0  0  0  0  0  0  0  0  0  0  0
    6.0795   -1.0792   12.1041 N   0  0  0  0  0  0  0  0  0  0  0  0
    6.2579   -0.0061   12.9449 C   0  0  0  0  0  0  0  0  0  0  0  0
    7.4004    0.0902   13.7036 N   0  0  0  0  0  0  0  0  0  0  0  0
    5.3439    0.9199   13.0226 N   0  0  0  0  0  0  0  0  0  0  0  0
    8.6463   -7.4461    4.5389 C   0  0  0  0  0  0  0  0  0  0  0  0
    9.9965   -7.3363    5.2502 C   0  0  0  0  0  0  0  0  0  0  0  0
    7.6599   -6.4559    5.1614 C   0  0  0  0  0  0  0  0  0  0  0  0
    3.6429   -2.5665    9.6108 C   0  0  0  0  0  0  0  0  0  0  0  0
   -0.7573  -10.1326    6.3794 C   0  0  0  0  0  0  0  0  0  0  0  0
   -1.0396  -10.1631    5.2050 O   0  0  0  0  0  0  0  0  0  0  0  0
   -1.6681  -10.4904    7.2982 O   0  0  0  0  0  0  0  0  0  0  0  0
    4.0217  -11.9948    5.7500 N   0  0  0  0  0  0  0  0  0  0  0  0
    4.0512  -12.9644    6.9048 R   0  0  0  0  0  0  0  0  0  0  0  0
    4.0818  -13.9673    8.0993 R   0  0  0  0  0  0  0  0  0  0  0  0
    9.1586   -3.2634    8.3740 C   0  0  0  0  0  0  0  0  0  0  0  0
   10.1185   -2.9550    7.7081 O   0  0  0  0  0  0  0  0  0  0  0  0
    8.7387   -2.4558    9.3605 O   0  0  0  0  0  0  0  0  0  0  0  0
    0.4126    0.5815    3.5898 O   0  0  0  0  0  0  0  0  0  0  0  0
    0.3693    0.5063    5.0162 C   0  0  0  0  0  0  0  0  0  0  0  0
  1  2  1  0      
  2  3  1  0      
  1  4  2  0      
  4  5  1  0      
  5  6  2  0      
  6  7  1  0      
  7  8  2  0      
  8  1  1  0      
  3  9  1  0      
  9 10  1  0      
 10 11  2  0      
 11 12  1  0      
  9 13  1  0      
 11 14  1  0      
 12 15  2  0      
 16 15  1  0      
 16 17  1  0      
 16 18  1  0      
 18 19  1  0      
 19 20  1  0      
 19 21  2  0      
 18 22  1  0      
 20 23  1  0      
 23 24  1  0      
 24 25  1  0      
 25 26  1  0      
 27 28  1  0      
 28 29  1  0      
 29 30  1  0      
 26 31  2  0      
 27 32  2  0      
 28 33  2  0      
 30 34  1  0      
 34 35  1  0      
 34 36  2  0      
 30 37  1  0      
 17 38  1  0      
 38 39  1  0      
 39 40  1  0      
 40 41  1  0      
 41 42  1  0      
 42 43  1  0      
 43 44  1  0      
 44 45  1  0      
 45 46  1  0      
 45 47  2  0      
 41 48  2  0      
 38 49  2  0      
 42 50  1  0      
 46 35  1  0      
 52 53  1  0      
 53 54  1  0      
 54 55  1  0      
 55 56  1  0      
 55 57  2  0      
 51 58  1  0      
 46 59  1  0      
 59 58  1  0      
 58 60  1  0      
 39 61  1  0      
 61 52  1  0      
 23 62  1  0      
 62 63  2  0      
 62 64  1  0      
 65 66  1  0      
 66 67  1  0      
 26 65  1  0      
 27 65  1  0      
 68 69  2  0      
 68 70  1  0      
 43 68  1  0      
 71 72  1  0      
  3 71  1  0      
M  STY  1   1 SUP
M  SLB  1   1   1
M  SAL   1  3  62  63  64
M  SBL   1  1  62
M  SMT   1 COOH
M  SBV   1 62   -8.6398    7.3437
M  STY  1   2 SUP
M  SLB  1   2   2
M  SAL   2  3  65  66  67
M  SBL   2  2  67  68
M  SMT   2 NR2
M  SBV   2 67   -8.2808    7.1366
M  SBV   2 68   -9.7097    7.1366
M  STY  1   3 SUP
M  SLB  1   3   3
M  SAL   3  3  68  69  70
M  SBL   3  1  71
M  SMT   3 COOH
M  SBV   3 71   -8.6392    6.1061
M  STY  1   4 SUP
M  SLB  1   4   4
M  SAL   4  2  71  72
M  SBL   4  1  73
M  SMT   4 OCH3
M  SBV   4 73   -8.0216    7.6997
M  END
$$$$
