# Supplementary material for: Occurrence of the Microcystins MC-LW and MC-LF in Dutch Surface Waters and Their Contribution to Total Microcystin Toxicity
Source: MDPI journal article supplement (doi:10.3390/md11072643), 2013-07-22
Supplement: s5 [file s5]

marinedrugs-11-02643-s002.mol
  ChemDraw04141418312D

 72 73  0  0  0  0  0  0  0  0999 V2000
   -6.7461    1.3171    0.0000 C   0  0  0  0  0  0  0  0  0  0  0  0
   -6.0316    0.9046    0.0000 C   0  0  0  0  0  0  0  0  0  0  0  0
   -5.3171    1.3171    0.0000 C   0  0  0  0  0  0  0  0  0  0  0  0
   -6.7461    2.1421    0.0000 C   0  0  0  0  0  0  0  0  0  0  0  0
   -7.4605    2.5546    0.0000 C   0  0  0  0  0  0  0  0  0  0  0  0
   -8.1749    2.1421    0.0000 C   0  0  0  0  0  0  0  0  0  0  0  0
   -8.1749    1.3171    0.0000 C   0  0  0  0  0  0  0  0  0  0  0  0
   -7.4605    0.9046    0.0000 C   0  0  0  0  0  0  0  0  0  0  0  0
   -4.6027    0.9046    0.0000 C   0  0  0  0  0  0  0  0  0  0  0  0
   -3.8883    1.3171    0.0000 C   0  0  0  0  0  0  0  0  0  0  0  0
   -3.1738    0.9046    0.0000 C   0  0  0  0  0  0  0  0  0  0  0  0
   -2.4594    1.3171    0.0000 C   0  0  0  0  0  0  0  0  0  0  0  0
   -5.0152    0.1902    0.0000 C   0  0  0  0  0  0  0  0  0  0  0  0
   -3.1738    0.0797    0.0000 C   0  0  0  0  0  0  0  0  0  0  0  0
   -1.7449    0.9046    0.0000 C   0  0  0  0  0  0  0  0  0  0  0  0
   -0.9506    1.2758    0.0000 C   0  0  0  0  0  0  0  0  0  0  0  0
   -0.2362    0.8633    0.0000 N   0  0  0  0  0  0  0  0  0  0  0  0
   -0.9506    2.1008    0.0000 C   0  0  0  0  0  0  0  0  0  0  0  0
   -0.2362    2.5133    0.0000 C   0  0  0  0  0  0  0  0  0  0  0  0
   -0.2362    3.3383    0.0000 N   0  0  0  0  0  0  0  0  0  0  0  0
    0.4783    2.1008    0.0000 O   0  0  0  0  0  0  0  0  0  0  0  0
   -1.7474    2.3144    0.0000 C   0  0  0  0  0  0  0  0  0  0  0  0
    0.3472    3.9216    0.0000 C   0  0  0  0  0  0  0  0  0  0  0  0
    1.0617    3.5092    0.0000 C   0  0  0  0  0  0  0  0  0  0  0  0
    1.7761    3.9216    0.0000 C   0  0  0  0  0  0  0  0  0  0  0  0
    2.4905    3.5092    0.0000 C   0  0  0  0  0  0  0  0  0  0  0  0
    3.9194    3.5092    0.0000 C   0  0  0  0  0  0  0  0  0  0  0  0
    4.6339    3.9216    0.0000 C   0  0  0  0  0  0  0  0  0  0  0  0
    5.3484    3.5092    0.0000 N   0  0  0  0  0  0  0  0  0  0  0  0
    5.3484    2.6842    0.0000 C   0  0  0  0  0  0  0  0  0  0  0  0
    2.4905    2.6842    0.0000 O   0  0  0  0  0  0  0  0  0  0  0  0
    3.9194    2.6842    0.0000 C   0  0  0  0  0  0  0  0  0  0  0  0
    4.6339    4.7466    0.0000 O   0  0  0  0  0  0  0  0  0  0  0  0
    6.0628    2.2717    0.0000 C   0  0  0  0  0  0  0  0  0  0  0  0
    6.0665    0.9691    0.0000 N   0  0  0  0  0  0  0  0  0  0  0  0
    6.7772    2.6842    0.0000 O   0  0  0  0  0  0  0  0  0  0  0  0
    4.7650    2.1008    0.0000 C   0  0  0  0  0  0  0  0  0  0  0  0
   -0.2362    0.0384    0.0000 C   0  0  0  0  0  0  0  0  0  0  0  0
    0.4783   -0.3741    0.0000 C   0  0  0  0  0  0  0  0  0  0  0  0
    1.1928    0.0384    0.0000 N   0  0  0  0  0  0  0  0  0  0  0  0
    1.9072   -0.3741    0.0000 C   0  0  0  0  0  0  0  0  0  0  0  0
    2.6216    0.0384    0.0000 C   0  0  0  0  0  0  0  0  0  0  0  0
    3.3361   -0.3741    0.0000 C   0  0  0  0  0  0  0  0  0  0  0  0
    4.0505    0.0384    0.0000 N   0  0  0  0  0  0  0  0  0  0  0  0
    4.7650   -0.3741    0.0000 C   0  0  0  0  0  0  0  0  0  0  0  0
    6.2315    0.0619    0.0000 C   0  0  0  0  0  0  0  0  0  0  0  0
    5.1775   -1.0885    0.0000 O   0  0  0  0  0  0  0  0  0  0  0  0
    1.9072   -1.1991    0.0000 O   0  0  0  0  0  0  0  0  0  0  0  0
   -0.9506   -0.3741    0.0000 O   0  0  0  0  0  0  0  0  0  0  0  0
    2.6216    0.8633    0.0000 R1  0  0  0  0  0  0  0  0  0  0  0  0
    8.1749    0.1002    0.0000 C   0  0  0  0  0  0  0  0  0  0  0  0
    0.1960   -1.8888    0.0000 C   0  0  0  0  0  0  0  0  0  0  0  0
    0.6085   -2.6033    0.0000 C   0  0  0  0  0  0  0  0  0  0  0  0
    0.1960   -3.3178    0.0000 N   0  0  0  0  0  0  0  0  0  0  0  0
    0.6085   -4.0321    0.0000 C   0  0  0  0  0  0  0  0  0  0  0  0
    1.4335   -4.0321    0.0000 N   0  0  0  0  0  0  0  0  0  0  0  0
    0.1960   -4.7466    0.0000 N   0  0  0  0  0  0  0  0  0  0  0  0
    7.4631   -0.3169    0.0000 C   0  0  0  0  0  0  0  0  0  0  0  0
    7.0284    0.2754    0.0000 C   0  0  0  0  0  0  0  0  0  0  0  0
    7.4631   -1.1419    0.0000 C   0  0  0  0  0  0  0  0  0  0  0  0
    0.8908   -1.0886    0.0000 C   0  0  0  0  0  0  0  0  0  0  0  0
    0.3465    4.3354    0.0000 C   0  0  0  0  0  0  0  0  0  0  0  0
    1.0610    3.9229    0.0000 O   0  0  0  0  0  0  0  0  0  0  0  0
   -0.3679    3.9229    0.0000 O   0  0  0  0  0  0  0  0  0  0  0  0
    2.8488    3.7157    0.0000 N   0  0  0  0  0  0  0  0  0  0  0  0
    3.4373    3.3760    0.0000 R   0  0  0  0  0  0  0  0  0  0  0  0
    4.0259    3.7157    0.0000 R   0  0  0  0  0  0  0  0  0  0  0  0
    3.3360   -1.1980    0.0000 C   0  0  0  0  0  0  0  0  0  0  0  0
    3.9245   -1.5377    0.0000 O   0  0  0  0  0  0  0  0  0  0  0  0
    2.7475   -1.5377    0.0000 O   0  0  0  0  0  0  0  0  0  0  0  0
   -4.6996    2.0868    0.0000 O   0  0  0  0  0  0  0  0  0  0  0  0
   -4.1111    1.7471    0.0000 C   0  0  0  0  0  0  0  0  0  0  0  0
  1  2  1  0      
  2  3  1  0      
  1  4  2  0      
  4  5  1  0      
  5  6  2  0      
  6  7  1  0      
  7  8  2  0      
  8  1  1  0      
  3  9  1  0      
  9 10  1  0      
 10 11  2  0      
 11 12  1  0      
  9 13  1  1      
 11 14  1  0      
 12 15  2  0      
 16 15  1  1      
 16 17  1  0      
 16 18  1  0      
 18 19  1  0      
 19 20  1  0      
 19 21  2  0      
 18 22  1  1      
 20 23  1  0      
 23 24  1  0      
 24 25  1  0      
 25 26  1  0      
 27 28  1  0      
 28 29  1  0      
 29 30  1  0      
 26 31  2  0      
 27 32  2  0      
 28 33  2  0      
 30 34  1  0      
 34 35  1  0      
 34 36  2  0      
 30 37  1  1      
 17 38  1  0      
 38 39  1  0      
 39 40  1  0      
 40 41  1  0      
 41 42  1  0      
 42 43  1  0      
 43 44  1  0      
 44 45  1  0      
 45 46  1  0      
 45 47  2  0      
 41 48  2  0      
 38 49  2  0      
 42 50  1  1      
 46 35  1  0      
 52 53  1  0      
 53 54  1  0      
 54 55  1  0      
 55 56  1  0      
 55 57  2  0      
 51 58  1  0      
 46 59  1  1      
 59 58  1  0      
 58 60  1  0      
 39 61  1  1      
 61 52  1  0      
 23 62  1  1      
 62 63  2  0      
 62 64  1  0      
 65 66  1  0      
 66 67  1  0      
 26 65  1  0      
 27 65  1  0      
 68 69  2  0      
 68 70  1  0      
 43 68  1  0      
 71 72  1  0      
  3 71  1  0      
M  STY  1   1 SUP
M  SLB  1   1   1
M  SAL   1  3  62  63  64
M  SBL   1  1  62
M  SMT   1 COOH
M  SBV   1 62   -8.6398    7.3437
M  STY  1   2 SUP
M  SLB  1   2   2
M  SAL   2  3  65  66  67
M  SBL   2  2  67  68
M  SMT   2 NR2
M  SBV   2 67   -8.2808    7.1366
M  SBV   2 68   -9.7097    7.1366
M  STY  1   3 SUP
M  SLB  1   3   3
M  SAL   3  3  68  69  70
M  SBL   3  1  71
M  SMT   3 COOH
M  SBV   3 71   -8.6392    6.1061
M  STY  1   4 SUP
M  SLB  1   4   4
M  SAL   4  2  71  72
M  SBL   4  1  73
M  SMT   4 OCH3
M  SBV   4 73   -8.0216    7.6997
M  END
