# Supplementary material for: Occurrence of the Microcystins MC-LW and MC-LF in Dutch Surface Waters and Their Contribution to Total Microcystin Toxicity
Source: MDPI journal article supplement (doi:10.3390/md11072643), 2013-07-22
Supplement: s6 [file s6]

marinedrugs-11-02643-s003.mol
  corina  04141406383D 1   1.00000     0.00000 
CORINA 3.49 0023  12.04.2013
 75 78  0  0  0  0  0  0  0  0999 V2000
    1.8620    5.1252    2.2832 C   0  0  0  0  0  0  0  0  0  0  0  0
    1.2563    3.7817    1.9684 C   0  0  0  0  0  0  0  0  0  0  0  0
    1.0186    3.0120    3.2691 C   0  0  0  0  0  0  0  0  0  0  0  0
    3.2356    5.2663    2.3468 C   0  0  0  0  0  0  0  0  0  0  0  0
    3.7912    6.4987    2.6356 C   0  0  0  0  0  0  0  0  0  0  0  0
    2.9732    7.5901    2.8604 C   0  0  0  0  0  0  0  0  0  0  0  0
    1.5995    7.4492    2.7960 C   0  0  0  0  0  0  0  0  0  0  0  0
    1.0440    6.2178    2.5028 C   0  0  0  0  0  0  0  0  0  0  0  0
    0.2906    1.7021    2.9608 C   0  0  0  0  0  0  0  0  0  0  0  0
    0.0564    0.9440    4.2420 C   0  0  0  0  0  0  0  0  0  0  0  0
    0.4980   -0.3030    4.3663 C   0  0  0  0  0  0  0  0  0  0  0  0
    0.3758   -1.0017    5.6552 C   0  0  0  0  0  0  0  0  0  0  0  0
   -1.0533    2.0094    2.2972 C   0  0  0  0  0  0  0  0  0  0  0  0
    1.1241   -1.0017    3.1869 C   0  0  0  0  0  0  0  0  0  0  0  0
    0.8174   -2.2487    5.7795 C   0  0  0  0  0  0  0  0  0  0  0  0
    0.6923   -2.9631    7.0976 C   0  0  0  0  0  0  0  0  0  0  0  0
    2.0167   -3.2543    7.6688 N   0  0  0  0  0  0  0  0  0  0  0  0
   -0.1304   -4.2403    6.9377 C   0  0  0  0  0  0  0  0  0  0  0  0
    0.5615   -5.2558    6.0824 C   0  0  0  0  0  0  0  0  0  0  0  0
    0.1101   -6.5375    5.9689 N   0  0  0  0  0  0  0  0  0  0  0  0
    1.5772   -4.9678    5.4676 O   0  0  0  0  0  0  0  0  0  0  0  0
   -1.4710   -3.8536    6.2941 C   0  0  0  0  0  0  0  0  0  0  0  0
   -0.7843   -7.0884    7.0005 C   0  0  0  0  0  0  0  0  0  0  0  0
   -0.3417   -8.5157    7.3299 C   0  0  0  0  0  0  0  0  0  0  0  0
   -0.5317   -9.4602    6.1492 C   0  0  0  0  0  0  0  0  0  0  0  0
    0.7692   -9.5869    5.3851 C   0  0  0  0  0  0  0  0  0  0  0  0
    3.0913  -10.1406    5.4656 C   0  0  0  0  0  0  0  0  0  0  0  0
    4.1570  -11.0246    6.0019 C   0  0  0  0  0  0  0  0  0  0  0  0
    5.4343  -10.5658    5.9940 N   0  0  0  0  0  0  0  0  0  0  0  0
    6.4889  -11.3176    6.7044 C   0  0  0  0  0  0  0  0  0  0  0  0
    0.8383   -9.0726    4.2914 O   0  0  0  0  0  0  0  0  0  0  0  0
    3.4179   -9.1820    4.5980 C   0  0  0  0  0  0  0  0  0  0  0  0
    3.8652  -12.1403    6.3862 O   0  0  0  0  0  0  0  0  0  0  0  0
    7.6919  -10.3954    6.7810 C   0  0  0  0  0  0  0  0  0  0  0  0
    7.4505   -9.0796    7.0188 N   0  0  0  0  0  0  0  0  0  0  0  0
    8.8068  -10.8334    6.6368 O   0  0  0  0  0  0  0  0  0  0  0  0
    6.0527  -11.6622    8.1289 C   0  0  0  0  0  0  0  0  0  0  0  0
    2.6273   -2.2298    8.3292 C   0  0  0  0  0  0  0  0  0  0  0  0
    3.9078   -2.4799    9.0824 C   0  0  0  0  0  0  0  0  0  0  0  0
    5.0091   -2.7218    8.1274 N   0  0  0  0  0  0  0  0  0  0  0  0
    5.8949   -3.7006    8.4828 C   0  0  0  0  0  0  0  0  0  0  0  0
    7.1156   -3.9347    7.6266 C   0  0  0  0  0  0  0  0  0  0  0  0
    8.2065   -4.6057    8.4610 C   0  0  0  0  0  0  0  0  0  0  0  0
    8.7827   -5.7294    7.6828 N   0  0  0  0  0  0  0  0  0  0  0  0
    8.1599   -6.9297    7.8412 C   0  0  0  0  0  0  0  0  0  0  0  0
    8.5804   -8.1305    7.0302 C   0  0  0  0  0  0  0  0  0  0  0  0
    7.2571   -7.0431    8.6497 O   0  0  0  0  0  0  0  0  0  0  0  0
    5.6985   -4.3752    9.4704 O   0  0  0  0  0  0  0  0  0  0  0  0
    2.1461   -1.1149    8.3136 O   0  0  0  0  0  0  0  0  0  0  0  0
    7.6408   -2.5658    7.0898 R1  0  0  0  0  0  0  0  0  0  0  0  0
    7.5871   -7.3294    4.8818 C   0  0  0  0  0  0  0  0  0  0  0  0
    7.0147   -6.0515    5.4984 C   0  0  0  0  0  0  0  0  0  0  0  0
    7.8672   -7.0974    3.3956 C   0  0  0  0  0  0  0  0  0  0  0  0
    3.1902   -1.0975   11.0138 C   0  0  0  0  0  0  0  0  0  0  0  0
    3.1004   -1.8630   12.2595 C   0  0  0  0  0  0  0  0  0  0  0  0
    2.1684   -0.2269   11.0136 C   0  0  0  0  0  0  0  0  0  0  0  0
    1.9751   -1.3653   12.9413 C   0  0  0  0  0  0  0  0  0  0  0  0
    1.4315   -0.3724   12.1574 N   0  0  0  0  0  0  0  0  0  0  0  0
    3.8589   -2.8905   12.8239 C   0  0  0  0  0  0  0  0  0  0  0  0
    3.5034   -3.4080   14.0374 C   0  0  0  0  0  0  0  0  0  0  0  0
    2.3934   -2.9205   14.7141 C   0  0  0  0  0  0  0  0  0  0  0  0
    1.6318   -1.9068   14.1760 C   0  0  0  0  0  0  0  0  0  0  0  0
    8.8893   -7.7005    5.5943 C   0  0  0  0  0  0  0  0  0  0  0  0
    4.2353   -1.2532    9.9393 C   0  0  0  0  0  0  0  0  0  0  0  0
    2.2737    2.7250    3.8889 O   0  0  0  0  0  0  0  0  0  0  0  0
    2.2140    2.6489    5.3147 C   0  0  0  0  0  0  0  0  0  0  0  0
   -2.2185   -7.0812    6.5451 C   0  0  0  0  0  0  0  0  0  0  0  0
   -2.4780   -7.0085    5.3672 O   0  0  0  0  0  0  0  0  0  0  0  0
   -3.2096   -7.1554    7.4473 O   0  0  0  0  0  0  0  0  0  0  0  0
    9.2906   -3.6034    8.7687 C   0  0  0  0  0  0  0  0  0  0  0  0
   10.2685   -3.5352    8.0623 O   0  0  0  0  0  0  0  0  0  0  0  0
    9.1690   -2.7870    9.8272 O   0  0  0  0  0  0  0  0  0  0  0  0
    1.7724  -10.3118    5.9464 N   0  0  0  0  0  0  0  0  0  0  0  0
    1.4869  -11.2544    7.0890 R   0  0  0  0  0  0  0  0  0  0  0  0
    1.1916  -12.2293    8.2706 R   0  0  0  0  0  0  0  0  0  0  0  0
  1  2  1  0      
  2  3  1  0      
  1  4  2  0      
  4  5  1  0      
  5  6  2  0      
  6  7  1  0      
  7  8  2  0      
  8  1  1  0      
  3  9  1  0      
  9 10  1  0      
 10 11  2  0      
 11 12  1  0      
  9 13  1  0      
 11 14  1  0      
 12 15  2  0      
 16 15  1  0      
 16 17  1  0      
 16 18  1  0      
 18 19  1  0      
 19 20  1  0      
 19 21  2  0      
 18 22  1  0      
 20 23  1  0      
 23 24  1  0      
 24 25  1  0      
 25 26  1  0      
 27 28  1  0      
 28 29  1  0      
 29 30  1  0      
 26 31  2  0      
 27 32  2  0      
 28 33  2  0      
 30 34  1  0      
 34 35  1  0      
 34 36  2  0      
 30 37  1  0      
 17 38  1  0      
 38 39  1  0      
 39 40  1  0      
 40 41  1  0      
 41 42  1  0      
 42 43  1  0      
 43 44  1  0      
 44 45  1  0      
 45 46  1  0      
 45 47  2  0      
 41 48  2  0      
 38 49  2  0      
 42 50  1  0      
 46 35  1  0      
 51 52  1  0      
 51 53  1  0      
 54 55  1  0      
 54 56  2  0      
 55 57  2  0      
 56 58  1  0      
 57 58  1  0      
 55 59  1  0      
 59 60  2  0      
 60 61  1  0      
 61 62  2  0      
 62 57  1  0      
 46 63  1  0      
 63 51  1  0      
 39 64  1  0      
 64 54  1  0      
 65 66  1  0      
  3 65  1  0      
 23 67  1  0      
 67 68  2  0      
 67 69  1  0      
 70 71  2  0      
 70 72  1  0      
 43 70  1  0      
 73 74  1  0      
 74 75  1  0      
 26 73  1  0      
 27 73  1  0      
M  STY  1   1 SUP
M  SLB  1   1   1
M  SAL   1  2  65  66
M  SBL   1  1  68
M  SMT   1 OCH3
M  SBV   1 68   -8.3559    7.7182
M  STY  1   2 SUP
M  SLB  1   2   2
M  SAL   2  3  67  68  69
M  SBL   2  1  69
M  SMT   2 COOH
M  SBV   2 69   -8.9741    7.3621
M  STY  1   3 SUP
M  SLB  1   3   3
M  SAL   3  3  70  71  72
M  SBL   3  1  74
M  SMT   3 COOH
M  SBV   3 74   -8.9735    6.1247
M  STY  1   4 SUP
M  SLB  1   4   4
M  SAL   4  3  73  74  75
M  SBL   4  2  77  78
M  SMT   4 NR2
M  SBV   4 77   -8.6151    7.1551
M  SBV   4 78  -10.0439    7.1551
M  END
$$$$
