# Supplementary material for: Occurrence of the Microcystins MC-LW and MC-LF in Dutch Surface Waters and Their Contribution to Total Microcystin Toxicity
Source: MDPI journal article supplement (doi:10.3390/md11072643), 2013-07-22
Supplement: s7 [file s7]

marinedrugs-11-02643-s003.mol
  ChemDraw04141418342D

 75 78  0  0  0  0  0  0  0  0999 V2000
   -7.0804    1.0498    0.0000 C   0  0  0  0  0  0  0  0  0  0  0  0
   -6.3659    0.6373    0.0000 C   0  0  0  0  0  0  0  0  0  0  0  0
   -5.6514    1.0498    0.0000 C   0  0  0  0  0  0  0  0  0  0  0  0
   -7.0804    1.8748    0.0000 C   0  0  0  0  0  0  0  0  0  0  0  0
   -7.7948    2.2873    0.0000 C   0  0  0  0  0  0  0  0  0  0  0  0
   -8.5092    1.8748    0.0000 C   0  0  0  0  0  0  0  0  0  0  0  0
   -8.5092    1.0498    0.0000 C   0  0  0  0  0  0  0  0  0  0  0  0
   -7.7948    0.6373    0.0000 C   0  0  0  0  0  0  0  0  0  0  0  0
   -4.9370    0.6373    0.0000 C   0  0  0  0  0  0  0  0  0  0  0  0
   -4.2225    1.0498    0.0000 C   0  0  0  0  0  0  0  0  0  0  0  0
   -3.5081    0.6373    0.0000 C   0  0  0  0  0  0  0  0  0  0  0  0
   -2.7937    1.0498    0.0000 C   0  0  0  0  0  0  0  0  0  0  0  0
   -5.3495   -0.0772    0.0000 C   0  0  0  0  0  0  0  0  0  0  0  0
   -3.5081   -0.1877    0.0000 C   0  0  0  0  0  0  0  0  0  0  0  0
   -2.0792    0.6373    0.0000 C   0  0  0  0  0  0  0  0  0  0  0  0
   -1.2849    1.0085    0.0000 C   0  0  0  0  0  0  0  0  0  0  0  0
   -0.5705    0.5960    0.0000 N   0  0  0  0  0  0  0  0  0  0  0  0
   -1.2849    1.8335    0.0000 C   0  0  0  0  0  0  0  0  0  0  0  0
   -0.5705    2.2460    0.0000 C   0  0  0  0  0  0  0  0  0  0  0  0
   -0.5705    3.0709    0.0000 N   0  0  0  0  0  0  0  0  0  0  0  0
    0.1440    1.8335    0.0000 O   0  0  0  0  0  0  0  0  0  0  0  0
   -2.0817    2.0471    0.0000 C   0  0  0  0  0  0  0  0  0  0  0  0
    0.0129    3.6543    0.0000 C   0  0  0  0  0  0  0  0  0  0  0  0
    0.7274    3.2418    0.0000 C   0  0  0  0  0  0  0  0  0  0  0  0
    1.4418    3.6543    0.0000 C   0  0  0  0  0  0  0  0  0  0  0  0
    2.1563    3.2418    0.0000 C   0  0  0  0  0  0  0  0  0  0  0  0
    3.5851    3.2418    0.0000 C   0  0  0  0  0  0  0  0  0  0  0  0
    4.2996    3.6543    0.0000 C   0  0  0  0  0  0  0  0  0  0  0  0
    5.0141    3.2418    0.0000 N   0  0  0  0  0  0  0  0  0  0  0  0
    5.0141    2.4169    0.0000 C   0  0  0  0  0  0  0  0  0  0  0  0
    2.1563    2.4169    0.0000 O   0  0  0  0  0  0  0  0  0  0  0  0
    3.5851    2.4169    0.0000 C   0  0  0  0  0  0  0  0  0  0  0  0
    4.2996    4.4793    0.0000 O   0  0  0  0  0  0  0  0  0  0  0  0
    5.7286    2.0044    0.0000 C   0  0  0  0  0  0  0  0  0  0  0  0
    5.7323    0.7018    0.0000 N   0  0  0  0  0  0  0  0  0  0  0  0
    6.4429    2.4169    0.0000 O   0  0  0  0  0  0  0  0  0  0  0  0
    4.4307    1.8335    0.0000 C   0  0  0  0  0  0  0  0  0  0  0  0
   -0.5705   -0.2290    0.0000 C   0  0  0  0  0  0  0  0  0  0  0  0
    0.1440   -0.6414    0.0000 C   0  0  0  0  0  0  0  0  0  0  0  0
    0.8585   -0.2290    0.0000 N   0  0  0  0  0  0  0  0  0  0  0  0
    1.5729   -0.6414    0.0000 C   0  0  0  0  0  0  0  0  0  0  0  0
    2.2874   -0.2290    0.0000 C   0  0  0  0  0  0  0  0  0  0  0  0
    3.0018   -0.6414    0.0000 C   0  0  0  0  0  0  0  0  0  0  0  0
    3.7162   -0.2290    0.0000 N   0  0  0  0  0  0  0  0  0  0  0  0
    4.4307   -0.6414    0.0000 C   0  0  0  0  0  0  0  0  0  0  0  0
    6.1799   -0.1703    0.0000 C   0  0  0  0  0  0  0  0  0  0  0  0
    4.8432   -1.3558    0.0000 O   0  0  0  0  0  0  0  0  0  0  0  0
    1.5729   -1.4664    0.0000 O   0  0  0  0  0  0  0  0  0  0  0  0
   -1.2849   -0.6414    0.0000 O   0  0  0  0  0  0  0  0  0  0  0  0
    2.2874    0.5960    0.0000 R1  0  0  0  0  0  0  0  0  0  0  0  0
    7.7535   -0.2290    0.0000 C   0  0  0  0  0  0  0  0  0  0  0  0
    8.5092    0.1423    0.0000 C   0  0  0  0  0  0  0  0  0  0  0  0
    7.7535   -1.0540    0.0000 C   0  0  0  0  0  0  0  0  0  0  0  0
    0.0436   -2.2254    0.0000 C   0  0  0  0  0  0  0  0  0  0  0  0
    0.0436   -3.0503    0.0000 C   0  0  0  0  0  0  0  0  0  0  0  0
    0.8685   -2.2254    0.0000 C   0  0  0  0  0  0  0  0  0  0  0  0
    0.8685   -3.0503    0.0000 C   0  0  0  0  0  0  0  0  0  0  0  0
    1.0781   -2.6498    0.0000 N   0  0  0  0  0  0  0  0  0  0  0  0
   -0.3689   -3.7648    0.0000 C   0  0  0  0  0  0  0  0  0  0  0  0
    0.0436   -4.4793    0.0000 C   0  0  0  0  0  0  0  0  0  0  0  0
    0.8685   -4.4793    0.0000 C   0  0  0  0  0  0  0  0  0  0  0  0
    1.2810   -3.7648    0.0000 C   0  0  0  0  0  0  0  0  0  0  0  0
    7.0316    0.2248    0.0000 C   0  0  0  0  0  0  0  0  0  0  0  0
    0.5565   -1.3559    0.0000 C   0  0  0  0  0  0  0  0  0  0  0  0
   -5.0339    1.8195    0.0000 O   0  0  0  0  0  0  0  0  0  0  0  0
   -4.4454    1.4797    0.0000 C   0  0  0  0  0  0  0  0  0  0  0  0
    0.0122    4.0679    0.0000 C   0  0  0  0  0  0  0  0  0  0  0  0
    0.7267    3.6554    0.0000 O   0  0  0  0  0  0  0  0  0  0  0  0
   -0.7022    3.6554    0.0000 O   0  0  0  0  0  0  0  0  0  0  0  0
    3.0017   -1.4653    0.0000 C   0  0  0  0  0  0  0  0  0  0  0  0
    3.5902   -1.8051    0.0000 O   0  0  0  0  0  0  0  0  0  0  0  0
    2.4132   -1.8051    0.0000 O   0  0  0  0  0  0  0  0  0  0  0  0
    2.5145    3.4484    0.0000 N   0  0  0  0  0  0  0  0  0  0  0  0
    3.1030    3.1087    0.0000 R   0  0  0  0  0  0  0  0  0  0  0  0
    3.6916    3.4484    0.0000 R   0  0  0  0  0  0  0  0  0  0  0  0
  1  2  1  0      
  2  3  1  0      
  1  4  2  0      
  4  5  1  0      
  5  6  2  0      
  6  7  1  0      
  7  8  2  0      
  8  1  1  0      
  3  9  1  0      
  9 10  1  0      
 10 11  2  0      
 11 12  1  0      
  9 13  1  1      
 11 14  1  0      
 12 15  2  0      
 16 15  1  1      
 16 17  1  0      
 16 18  1  0      
 18 19  1  0      
 19 20  1  0      
 19 21  2  0      
 18 22  1  1      
 20 23  1  0      
 23 24  1  0      
 24 25  1  0      
 25 26  1  0      
 27 28  1  0      
 28 29  1  0      
 29 30  1  0      
 26 31  2  0      
 27 32  2  0      
 28 33  2  0      
 30 34  1  0      
 34 35  1  0      
 34 36  2  0      
 30 37  1  1      
 17 38  1  0      
 38 39  1  0      
 39 40  1  0      
 40 41  1  0      
 41 42  1  0      
 42 43  1  0      
 43 44  1  0      
 44 45  1  0      
 45 46  1  0      
 45 47  2  0      
 41 48  2  0      
 38 49  2  0      
 42 50  1  1      
 46 35  1  0      
 51 52  1  0      
 51 53  1  0      
 54 55  1  0      
 54 56  2  0      
 55 57  2  0      
 56 58  1  0      
 57 58  1  0      
 55 59  1  0      
 59 60  2  0      
 60 61  1  0      
 61 62  2  0      
 62 57  1  0      
 46 63  1  1      
 63 51  1  0      
 39 64  1  1      
 64 54  1  0      
 65 66  1  0      
  3 65  1  0      
 23 67  1  1      
 67 68  2  0      
 67 69  1  0      
 70 71  2  0      
 70 72  1  0      
 43 70  1  0      
 73 74  1  0      
 74 75  1  0      
 26 73  1  0      
 27 73  1  0      
M  STY  1   1 SUP
M  SLB  1   1   1
M  SAL   1  2  65  66
M  SBL   1  1  68
M  SMT   1 OCH3
M  SBV   1 68   -8.3559    7.7182
M  STY  1   2 SUP
M  SLB  1   2   2
M  SAL   2  3  67  68  69
M  SBL   2  1  69
M  SMT   2 COOH
M  SBV   2 69   -8.9741    7.3621
M  STY  1   3 SUP
M  SLB  1   3   3
M  SAL   3  3  70  71  72
M  SBL   3  1  74
M  SMT   3 COOH
M  SBV   3 74   -8.9735    6.1247
M  STY  1   4 SUP
M  SLB  1   4   4
M  SAL   4  3  73  74  75
M  SBL   4  2  77  78
M  SMT   4 NR2
M  SBV   4 77   -8.6151    7.1551
M  SBV   4 78  -10.0439    7.1551
M  END
