# Supplementary material for: Occurrence of the Microcystins MC-LW and MC-LF in Dutch Surface Waters and Their Contribution to Total Microcystin Toxicity
Source: MDPI journal article supplement (doi:10.3390/md11072643), 2013-07-22
Supplement: s8 [file s8]

marinedrugs-11-02643-s004.mol
  corina  04141406383D 1   1.00000     0.00000 
CORINA 3.49 0023  12.04.2013
 72 74  0  0  0  0  0  0  0  0999 V2000
    1.5974    6.3441    1.5225 C   0  0  0  0  0  0  0  0  0  0  0  0
    1.0597    4.9654    1.2375 C   0  0  0  0  0  0  0  0  0  0  0  0
    0.8642    4.2119    2.5547 C   0  0  0  0  0  0  0  0  0  0  0  0
    2.9623    6.5557    1.5786 C   0  0  0  0  0  0  0  0  0  0  0  0
    3.4555    7.8203    1.8400 C   0  0  0  0  0  0  0  0  0  0  0  0
    2.5838    8.8734    2.0449 C   0  0  0  0  0  0  0  0  0  0  0  0
    1.2189    8.6620    1.9880 C   0  0  0  0  0  0  0  0  0  0  0  0
    0.7258    7.3982    1.7222 C   0  0  0  0  0  0  0  0  0  0  0  0
    0.2027    2.8608    2.2760 C   0  0  0  0  0  0  0  0  0  0  0  0
    0.0101    2.1186    3.5734 C   0  0  0  0  0  0  0  0  0  0  0  0
    0.4868    0.8860    3.7108 C   0  0  0  0  0  0  0  0  0  0  0  0
    0.3598    0.1876    4.9993 C   0  0  0  0  0  0  0  0  0  0  0  0
   -1.1566    3.0860    1.6107 C   0  0  0  0  0  0  0  0  0  0  0  0
    1.1575    0.2034    2.5466 C   0  0  0  0  0  0  0  0  0  0  0  0
    0.8365   -1.0450    5.1367 C   0  0  0  0  0  0  0  0  0  0  0  0
    0.7067   -1.7593    6.4545 C   0  0  0  0  0  0  0  0  0  0  0  0
    2.0275   -2.0084    7.0531 N   0  0  0  0  0  0  0  0  0  0  0  0
   -0.0734   -3.0614    6.2824 C   0  0  0  0  0  0  0  0  0  0  0  0
    0.6661   -4.0578    5.4447 C   0  0  0  0  0  0  0  0  0  0  0  0
    0.2563   -5.3529    5.3264 N   0  0  0  0  0  0  0  0  0  0  0  0
    1.6848   -3.7406    4.8494 O   0  0  0  0  0  0  0  0  0  0  0  0
   -1.4119   -2.7175    5.6107 C   0  0  0  0  0  0  0  0  0  0  0  0
   -0.6416   -5.9279    6.3418 C   0  0  0  0  0  0  0  0  0  0  0  0
   -0.1626   -7.3401    6.6849 C   0  0  0  0  0  0  0  0  0  0  0  0
   -0.2999   -8.2932    5.5038 C   0  0  0  0  0  0  0  0  0  0  0  0
    1.0195   -8.3824    4.7664 C   0  0  0  0  0  0  0  0  0  0  0  0
    3.3552   -8.8649    4.8954 C   0  0  0  0  0  0  0  0  0  0  0  0
    4.4362   -9.7145    5.4561 C   0  0  0  0  0  0  0  0  0  0  0  0
    5.6988   -9.2170    5.4722 N   0  0  0  0  0  0  0  0  0  0  0  0
    6.7613   -9.9344    6.2062 C   0  0  0  0  0  0  0  0  0  0  0  0
    1.0949   -7.8693    3.6726 O   0  0  0  0  0  0  0  0  0  0  0  0
    3.6699   -7.8992    4.0313 C   0  0  0  0  0  0  0  0  0  0  0  0
    4.1707  -10.8375    5.8382 O   0  0  0  0  0  0  0  0  0  0  0  0
    7.9339   -8.9758    6.3039 C   0  0  0  0  0  0  0  0  0  0  0  0
    7.6479   -7.6673    6.5322 N   0  0  0  0  0  0  0  0  0  0  0  0
    9.0643   -9.3800    6.1835 O   0  0  0  0  0  0  0  0  0  0  0  0
    6.3071  -10.2882    7.6229 C   0  0  0  0  0  0  0  0  0  0  0  0
    2.5932   -0.9639    7.7221 C   0  0  0  0  0  0  0  0  0  0  0  0
    3.8653   -1.1728    8.5018 C   0  0  0  0  0  0  0  0  0  0  0  0
    4.9924   -1.3837    7.5700 N   0  0  0  0  0  0  0  0  0  0  0  0
    5.9003   -2.3341    7.9464 C   0  0  0  0  0  0  0  0  0  0  0  0
    7.1445   -2.5332    7.1157 C   0  0  0  0  0  0  0  0  0  0  0  0
    8.2382   -3.1684    7.9741 C   0  0  0  0  0  0  0  0  0  0  0  0
    8.8639   -4.2762    7.2115 N   0  0  0  0  0  0  0  0  0  0  0  0
    8.2748   -5.4945    7.3615 C   0  0  0  0  0  0  0  0  0  0  0  0
    8.7479   -6.6841    6.5631 C   0  0  0  0  0  0  0  0  0  0  0  0
    7.3598   -5.6331    8.1520 O   0  0  0  0  0  0  0  0  0  0  0  0
    5.7046   -3.0116    8.9322 O   0  0  0  0  0  0  0  0  0  0  0  0
    2.0787    0.1358    7.6931 O   0  0  0  0  0  0  0  0  0  0  0  0
    7.6386   -1.1505    6.5849 R1  0  0  0  0  0  0  0  0  0  0  0  0
    3.0677    0.1920   10.4143 C   0  0  0  0  0  0  0  0  0  0  0  0
    3.1692   -0.5246   11.5921 C   0  0  0  0  0  0  0  0  0  0  0  0
    2.1903   -0.4044   12.5608 C   0  0  0  0  0  0  0  0  0  0  0  0
    1.1102    0.4327   12.3518 C   0  0  0  0  0  0  0  0  0  0  0  0
    1.0092    1.1499   11.1744 C   0  0  0  0  0  0  0  0  0  0  0  0
    1.9874    1.0286   10.2051 C   0  0  0  0  0  0  0  0  0  0  0  0
    9.0725   -6.2490    5.1322 C   0  0  0  0  0  0  0  0  0  0  0  0
    7.7742   -5.9218    4.3918 C   0  0  0  0  0  0  0  0  0  0  0  0
    7.1458   -4.6642    4.9956 C   0  0  0  0  0  0  0  0  0  0  0  0
    8.0782   -5.6798    2.9119 C   0  0  0  0  0  0  0  0  0  0  0  0
    4.1380    0.0657    9.3609 C   0  0  0  0  0  0  0  0  0  0  0  0
   -2.0659   -5.9656    5.8576 C   0  0  0  0  0  0  0  0  0  0  0  0
   -2.3036   -5.9042    4.6745 O   0  0  0  0  0  0  0  0  0  0  0  0
   -3.0723   -6.0674    6.7400 O   0  0  0  0  0  0  0  0  0  0  0  0
    2.1337    4.0016    3.1762 O   0  0  0  0  0  0  0  0  0  0  0  0
    2.0811    3.9523    4.6033 C   0  0  0  0  0  0  0  0  0  0  0  0
    9.2849   -2.1326    8.3001 C   0  0  0  0  0  0  0  0  0  0  0  0
   10.2749   -2.0375    7.6140 O   0  0  0  0  0  0  0  0  0  0  0  0
    9.1166   -1.3165    9.3524 O   0  0  0  0  0  0  0  0  0  0  0  0
    2.0326   -9.0749    5.3503 N   0  0  0  0  0  0  0  0  0  0  0  0
    1.7529  -10.0225    6.4901 R   0  0  0  0  0  0  0  0  0  0  0  0
    1.4637  -11.0026    7.6688 R   0  0  0  0  0  0  0  0  0  0  0  0
  1  2  1  0      
  2  3  1  0      
  1  4  2  0      
  4  5  1  0      
  5  6  2  0      
  6  7  1  0      
  7  8  2  0      
  8  1  1  0      
  3  9  1  0      
  9 10  1  0      
 10 11  2  0      
 11 12  1  0      
  9 13  1  0      
 11 14  1  0      
 12 15  2  0      
 16 15  1  0      
 16 17  1  0      
 16 18  1  0      
 18 19  1  0      
 19 20  1  0      
 19 21  2  0      
 18 22  1  0      
 20 23  1  0      
 23 24  1  0      
 24 25  1  0      
 25 26  1  0      
 27 28  1  0      
 28 29  1  0      
 29 30  1  0      
 26 31  2  0      
 27 32  2  0      
 28 33  2  0      
 30 34  1  0      
 34 35  1  0      
 34 36  2  0      
 30 37  1  0      
 17 38  1  0      
 38 39  1  0      
 39 40  1  0      
 40 41  1  0      
 41 42  1  0      
 42 43  1  0      
 43 44  1  0      
 44 45  1  0      
 45 46  1  0      
 45 47  2  0      
 41 48  2  0      
 38 49  2  0      
 42 50  1  0      
 46 35  1  0      
 51 52  1  0      
 52 53  2  0      
 53 54  1  0      
 54 55  2  0      
 55 56  1  0      
 56 51  2  0      
 46 57  1  0      
 57 58  1  0      
 58 59  1  0      
 58 60  1  0      
 39 61  1  0      
 61 51  1  0      
 23 62  1  0      
 62 63  2  0      
 62 64  1  0      
 65 66  1  0      
  3 65  1  0      
 67 68  2  0      
 67 69  1  0      
 43 67  1  0      
 70 71  1  0      
 71 72  1  0      
 26 70  1  0      
 27 70  1  0      
M  STY  1   1 SUP
M  SLB  1   1   1
M  SAL   1  3  62  63  64
M  SBL   1  1  63
M  SMT   1 COOH
M  SBV   1 63   -8.8156    7.2672
M  STY  1   2 SUP
M  SLB  1   2   2
M  SAL   2  2  65  66
M  SBL   2  1  67
M  SMT   2 OCH3
M  SBV   2 67   -8.1974    7.6241
M  STY  1   3 SUP
M  SLB  1   3   3
M  SAL   3  3  67  68  69
M  SBL   3  1  70
M  SMT   3 COOH
M  SBV   3 70   -8.8150    6.0306
M  STY  1   4 SUP
M  SLB  1   4   4
M  SAL   4  3  70  71  72
M  SBL   4  2  73  74
M  SMT   4 NR2
M  SBV   4 73   -8.4567    7.0610
M  SBV   4 74   -9.8856    7.0610
M  END
$$$$
