# Supplementary material for: Occurrence of the Microcystins MC-LW and MC-LF in Dutch Surface Waters and Their Contribution to Total Microcystin Toxicity
Source: MDPI journal article supplement (doi:10.3390/md11072643), 2013-07-22
Supplement: s9 [file s9]

marinedrugs-11-02643-s004.mol
  ChemDraw04141418372D

 72 74  0  0  0  0  0  0  0  0999 V2000
   -6.9218    0.6307    0.0000 C   0  0  0  0  0  0  0  0  0  0  0  0
   -6.2074    0.2182    0.0000 C   0  0  0  0  0  0  0  0  0  0  0  0
   -5.4930    0.6307    0.0000 C   0  0  0  0  0  0  0  0  0  0  0  0
   -6.9218    1.4557    0.0000 C   0  0  0  0  0  0  0  0  0  0  0  0
   -7.6363    1.8682    0.0000 C   0  0  0  0  0  0  0  0  0  0  0  0
   -8.3508    1.4557    0.0000 C   0  0  0  0  0  0  0  0  0  0  0  0
   -8.3508    0.6307    0.0000 C   0  0  0  0  0  0  0  0  0  0  0  0
   -7.6363    0.2182    0.0000 C   0  0  0  0  0  0  0  0  0  0  0  0
   -4.7785    0.2182    0.0000 C   0  0  0  0  0  0  0  0  0  0  0  0
   -4.0640    0.6307    0.0000 C   0  0  0  0  0  0  0  0  0  0  0  0
   -3.3496    0.2182    0.0000 C   0  0  0  0  0  0  0  0  0  0  0  0
   -2.6352    0.6307    0.0000 C   0  0  0  0  0  0  0  0  0  0  0  0
   -5.1910   -0.4963    0.0000 C   0  0  0  0  0  0  0  0  0  0  0  0
   -3.3496   -0.6068    0.0000 C   0  0  0  0  0  0  0  0  0  0  0  0
   -1.9207    0.2182    0.0000 C   0  0  0  0  0  0  0  0  0  0  0  0
   -1.1264    0.5894    0.0000 C   0  0  0  0  0  0  0  0  0  0  0  0
   -0.4119    0.1769    0.0000 N   0  0  0  0  0  0  0  0  0  0  0  0
   -1.1264    1.4144    0.0000 C   0  0  0  0  0  0  0  0  0  0  0  0
   -0.4119    1.8269    0.0000 C   0  0  0  0  0  0  0  0  0  0  0  0
   -0.4119    2.6518    0.0000 N   0  0  0  0  0  0  0  0  0  0  0  0
    0.3025    1.4144    0.0000 O   0  0  0  0  0  0  0  0  0  0  0  0
   -1.9233    1.6280    0.0000 C   0  0  0  0  0  0  0  0  0  0  0  0
    0.1714    3.2352    0.0000 C   0  0  0  0  0  0  0  0  0  0  0  0
    0.8858    2.8227    0.0000 C   0  0  0  0  0  0  0  0  0  0  0  0
    1.6003    3.2352    0.0000 C   0  0  0  0  0  0  0  0  0  0  0  0
    2.3147    2.8227    0.0000 C   0  0  0  0  0  0  0  0  0  0  0  0
    3.7437    2.8227    0.0000 C   0  0  0  0  0  0  0  0  0  0  0  0
    4.4581    3.2352    0.0000 C   0  0  0  0  0  0  0  0  0  0  0  0
    5.1725    2.8227    0.0000 N   0  0  0  0  0  0  0  0  0  0  0  0
    5.1725    1.9978    0.0000 C   0  0  0  0  0  0  0  0  0  0  0  0
    2.3147    1.9978    0.0000 O   0  0  0  0  0  0  0  0  0  0  0  0
    3.7437    1.9978    0.0000 C   0  0  0  0  0  0  0  0  0  0  0  0
    4.4581    4.0602    0.0000 O   0  0  0  0  0  0  0  0  0  0  0  0
    5.8870    1.5853    0.0000 C   0  0  0  0  0  0  0  0  0  0  0  0
    5.8907    0.2827    0.0000 N   0  0  0  0  0  0  0  0  0  0  0  0
    6.6015    1.9978    0.0000 O   0  0  0  0  0  0  0  0  0  0  0  0
    4.5892    1.4144    0.0000 C   0  0  0  0  0  0  0  0  0  0  0  0
   -0.4119   -0.6481    0.0000 C   0  0  0  0  0  0  0  0  0  0  0  0
    0.3025   -1.0605    0.0000 C   0  0  0  0  0  0  0  0  0  0  0  0
    1.0169   -0.6481    0.0000 N   0  0  0  0  0  0  0  0  0  0  0  0
    1.7314   -1.0605    0.0000 C   0  0  0  0  0  0  0  0  0  0  0  0
    2.4459   -0.6481    0.0000 C   0  0  0  0  0  0  0  0  0  0  0  0
    3.1603   -1.0605    0.0000 C   0  0  0  0  0  0  0  0  0  0  0  0
    3.8747   -0.6481    0.0000 N   0  0  0  0  0  0  0  0  0  0  0  0
    4.5892   -1.0605    0.0000 C   0  0  0  0  0  0  0  0  0  0  0  0
    6.3385   -0.5894    0.0000 C   0  0  0  0  0  0  0  0  0  0  0  0
    5.0017   -1.7749    0.0000 O   0  0  0  0  0  0  0  0  0  0  0  0
    1.7314   -1.8855    0.0000 O   0  0  0  0  0  0  0  0  0  0  0  0
   -1.1264   -1.0605    0.0000 O   0  0  0  0  0  0  0  0  0  0  0  0
    2.4459    0.1769    0.0000 R1  0  0  0  0  0  0  0  0  0  0  0  0
   -0.1186   -2.3967    0.0000 C   0  0  0  0  0  0  0  0  0  0  0  0
   -0.8460   -2.8227    0.0000 C   0  0  0  0  0  0  0  0  0  0  0  0
   -0.8460   -3.6477    0.0000 C   0  0  0  0  0  0  0  0  0  0  0  0
   -0.1316   -4.0602    0.0000 C   0  0  0  0  0  0  0  0  0  0  0  0
    0.5828   -3.6477    0.0000 C   0  0  0  0  0  0  0  0  0  0  0  0
    0.5828   -2.8227    0.0000 C   0  0  0  0  0  0  0  0  0  0  0  0
    7.0529   -0.1769    0.0000 C   0  0  0  0  0  0  0  0  0  0  0  0
    7.6363   -0.7602    0.0000 C   0  0  0  0  0  0  0  0  0  0  0  0
    8.3508   -0.3477    0.0000 C   0  0  0  0  0  0  0  0  0  0  0  0
    7.6363   -1.5852    0.0000 C   0  0  0  0  0  0  0  0  0  0  0  0
   -0.1112   -1.6843    0.0000 C   0  0  0  0  0  0  0  0  0  0  0  0
    0.1707    3.6479    0.0000 C   0  0  0  0  0  0  0  0  0  0  0  0
    0.8852    3.2354    0.0000 O   0  0  0  0  0  0  0  0  0  0  0  0
   -0.5438    3.2354    0.0000 O   0  0  0  0  0  0  0  0  0  0  0  0
   -4.8754    1.4004    0.0000 O   0  0  0  0  0  0  0  0  0  0  0  0
   -4.2869    1.0606    0.0000 C   0  0  0  0  0  0  0  0  0  0  0  0
    3.1602   -1.8844    0.0000 C   0  0  0  0  0  0  0  0  0  0  0  0
    3.7487   -2.2242    0.0000 O   0  0  0  0  0  0  0  0  0  0  0  0
    2.5717   -2.2242    0.0000 O   0  0  0  0  0  0  0  0  0  0  0  0
    2.6730    3.0293    0.0000 N   0  0  0  0  0  0  0  0  0  0  0  0
    3.2615    2.6896    0.0000 R   0  0  0  0  0  0  0  0  0  0  0  0
    3.8500    3.0293    0.0000 R   0  0  0  0  0  0  0  0  0  0  0  0
  1  2  1  0      
  2  3  1  0      
  1  4  2  0      
  4  5  1  0      
  5  6  2  0      
  6  7  1  0      
  7  8  2  0      
  8  1  1  0      
  3  9  1  0      
  9 10  1  0      
 10 11  2  0      
 11 12  1  0      
  9 13  1  1      
 11 14  1  0      
 12 15  2  0      
 16 15  1  1      
 16 17  1  0      
 16 18  1  0      
 18 19  1  0      
 19 20  1  0      
 19 21  2  0      
 18 22  1  1      
 20 23  1  0      
 23 24  1  0      
 24 25  1  0      
 25 26  1  0      
 27 28  1  0      
 28 29  1  0      
 29 30  1  0      
 26 31  2  0      
 27 32  2  0      
 28 33  2  0      
 30 34  1  0      
 34 35  1  0      
 34 36  2  0      
 30 37  1  1      
 17 38  1  0      
 38 39  1  0      
 39 40  1  0      
 40 41  1  0      
 41 42  1  0      
 42 43  1  0      
 43 44  1  0      
 44 45  1  0      
 45 46  1  0      
 45 47  2  0      
 41 48  2  0      
 38 49  2  0      
 42 50  1  1      
 46 35  1  0      
 51 52  1  0      
 52 53  2  0      
 53 54  1  0      
 54 55  2  0      
 55 56  1  0      
 56 51  2  0      
 46 57  1  1      
 57 58  1  0      
 58 59  1  0      
 58 60  1  0      
 39 61  1  1      
 61 51  1  0      
 23 62  1  1      
 62 63  2  0      
 62 64  1  0      
 65 66  1  0      
  3 65  1  0      
 67 68  2  0      
 67 69  1  0      
 43 67  1  0      
 70 71  1  0      
 71 72  1  0      
 26 70  1  0      
 27 70  1  0      
M  STY  1   1 SUP
M  SLB  1   1   1
M  SAL   1  3  62  63  64
M  SBL   1  1  63
M  SMT   1 COOH
M  SBV   1 63   -8.8156    7.2672
M  STY  1   2 SUP
M  SLB  1   2   2
M  SAL   2  2  65  66
M  SBL   2  1  67
M  SMT   2 OCH3
M  SBV   2 67   -8.1974    7.6241
M  STY  1   3 SUP
M  SLB  1   3   3
M  SAL   3  3  67  68  69
M  SBL   3  1  70
M  SMT   3 COOH
M  SBV   3 70   -8.8150    6.0306
M  STY  1   4 SUP
M  SLB  1   4   4
M  SAL   4  3  70  71  72
M  SBL   4  2  73  74
M  SMT   4 NR2
M  SBV   4 73   -8.4567    7.0610
M  SBV   4 74   -9.8856    7.0610
M  END
